# Supplementary material
Source: publisher figshare collection journal article supplement (https://gsajournals.figshare.com/ndownloader/files/25117058)
Supplement: Supplementary file 1 [file 25117058]

## Sheet: Sheet1
		Genotype calls
		N	Not N
Chromosome	X	154	522
	autosome	488	8584
